# Supplementary material for: HEATR2 Plays a Conserved Role in Assembly of the Ciliary Motile Apparatus
Source: PubMed Central journal article supplement (PMC4168999; doi:10.1371/journal.pgen.1004577), 2014-09-18
Supplement: pgen.1004577.s010.pdf [file pgen.1004577.s010.pdf]

**Table S2.** *CG31320* and *HEATR2* orthologues share conserved upstream regulatory FOX motifs and X-boxes associated with a master cilia motility transcriptional program.

| Organism               | Name           | Gene               | FOX motif      | Distance F to ATG | Distance F to txn | X box             |                   | Distance X to ATG | Distance between Xs | Distance F to X |
|------------------------|----------------|--------------------|----------------|-------------------|-------------------|-------------------|-------------------|-------------------|---------------------|-----------------|
| <i>D. melanogaster</i> | <i>CG31320</i> | FBgn0051320        | <u>ATAACA</u>  | -591              | +4                | <u>GTAGCC</u>     | AT <u>AGCAAC</u>  | -536              | -24                 | 42              |
|                        |                |                    | <u>GACGCT</u>  |                   |                   | TG <u>AGTAAC</u>  | -512              |                   | 65                  |                 |
| <i>H. sapiens</i>      | <i>HEATR2</i>  | ENSG00000164818    | <u>ACTAACA</u> | -1036             | -1016             | <u>GCTCCT</u>     | TAG <u>GATAAC</u> | -947              | -15                 | 89              |
|                        |                |                    | <u>ACCAATA</u> | -762              | -722              | <u>ACCACT</u>     | ATC <u>ATCAAC</u> | -932              |                     | 104             |
|                        |                |                    | <u>TCAAACA</u> | -379              | -359              | <u>GGGGTT</u>     | CC <u>GGCGAC</u>  | -167              | -158                | 108             |
|                        |                |                    | <u>GCCTATA</u> | -275              | -235              | <u>GTCC</u>       | CTT <u>AGTGAC</u> | -9                |                     | 266             |
| <i>G. gorilla</i>      | <i>HEATR2</i>  | ENSGGOG00000013100 | <u>GACAATA</u> | -142              | -142              | <u>GGGGCT</u>     | CC <u>GGCGAC</u>  | -172              | -156                | 30              |
|                        |                |                    | <u>GTCC</u>    |                   |                   | CTT <u>AGTGAC</u> | -16               |                   | 126                 |                 |
| <i>B. taurus</i>       | <i>HEATR2</i>  | ENSBTAG00000048140 | <u>GCCAATA</u> | -97               | -97               | <u>GCAGCC</u>     | A <u>GCAGAC</u>   | -167              | -151                | -70             |
|                        |                |                    | <u>GTCC</u>    |                   |                   | CCT <u>AGTGAC</u> | -16               |                   | 81                  |                 |
| <i>S. scrofa</i>       | <i>HEATR2</i>  | ENSSSCG00000027809 | <u>ACCAACA</u> | -345              | -305              | <u>GTAATC</u>     | CGC <u>GCCAAC</u> | -50               | -34                 | 280             |
|                        |                |                    | <u>GCCAATA</u> | -98               | -58               | <u>GCTCC</u>      | CCT <u>GGTGAC</u> | -16               |                     | 324             |
| <i>C. lupus</i>        | <i>HEATR2</i>  | ENSCAFG00000011256 | <u>TCCAATA</u> | -408              | (-51)             | <u>GTCC</u>       | GC <u>TGCAAC</u>  | -545 (-188)       |                     | 128             |
|                        |                |                    | <u>GCCAATA</u> | -97               | 253               | <u>GTGCTC</u>     | CGC <u>GCCAAC</u> | -77               | -61                 | 20              |
|                        |                |                    | <u>GTCC</u>    |                   |                   | CCT <u>GGCGAC</u> | -16               |                   | 81                  |                 |
| <i>M. musculus</i>     | <i>Heatr2</i>  | ENSMUSG00000025857 | <u>GCCAATT</u> | -237              | -213              | <u>TCAGCC</u>     | TCG <u>AGCAAC</u> | -85               | -69                 | 137             |
|                        |                |                    | <u>GTCC</u>    |                   |                   | TT <u>GGAGAC</u>  | -16               |                   | -16                 |                 |
| <i>R. norvegicus</i>   | <i>Heatr2</i>  | ENSRNOG00000021312 | <u>GCCAATA</u> | -241              | -241              | <u>GCTGCC</u>     | TCG <u>AGCAAC</u> | -85               | -69                 | 141             |
|                        |                |                    | <u>GTCC</u>    |                   |                   | TT <u>GGAGAC</u>  | -16               |                   | -16                 |                 |
| <i>D. ordii</i>        | <i>Heatr2</i>  | ENSDORG0000000580  | <u>GTCATCA</u> | -141              | -141              | <u>GCTGTC</u>     | GCG <u>AGCGAC</u> | -95               | -79                 | 46              |
|                        |                |                    | <u>GTCC</u>    |                   |                   | TT <u>AGTGAC</u>  | -16               |                   | 225                 |                 |
| <i>C. porcellus</i>    | <i>Heatr2</i>  | ENSCPOG00000004219 | <u>CCCAACA</u> | -211              | -211              | <u>CCCGCC</u>     | CC <u>CACAAC</u>  | -178              | -162                | 33              |
|                        |                |                    | <u>GTCC</u>    |                   |                   | TT <u>GGTGAC</u>  | -16               |                   | 195                 |                 |
| <i>G. gallus</i>       | <i>HEATR2</i>  | ENSGALG00000003684 | <u>ATAAATA</u> | -174              | -174              | <u>AGCATT</u>     | A <u>AAGCAC</u>   | -126              | -96                 | 48              |
|                        |                |                    | <u>GCGTCC</u>  |                   |                   | TT <u>AGCAAC</u>  | -30               |                   | 144                 |                 |
| <i>X. tropicalis</i>   | <i>heatr2</i>  | ENSXETG00000021643 | <u>GCAAACC</u> | -283              | -283              | <u>GTTGCC</u>     | T <u>AGCAAC</u>   | -114              | -28                 | 113             |
|                        |                |                    | <u>TCCAACA</u> | -1                | -1                | <u>CCTGTT</u>     | GC <u>TGAGAC</u>  | -86               |                     | 85              |
| <i>T. rubripes</i>     | <i>HEATR2</i>  | ENSTRUG00000003816 | <u>GTCAACA</u> | -380              | -380              | <u>ACAGCC</u>     | AAT <u>CACGAC</u> | -57               | -41                 | 5               |
|                        |                |                    | <u>GCCAATC</u> | -62               | -62               | <u>GTTGTC</u>     | AT <u>AGCAAC</u>  | -16               |                     | 46              |

RYMAAYA

RYYNY N(1-3) RRNRAC  
GTTGCC AT GGCAAC
