# Supplementary material for: HEATR2 Plays a Conserved Role in Assembly of the Ciliary Motile Apparatus
Source: PubMed Central journal article supplement (PMC4168999; doi:10.1371/journal.pgen.1004577), 2014-09-18
Supplement: pgen.1004577.s011.pdf [file pgen.1004577.s011.pdf]

**Table S3. Details of primary and secondary antibodies used in this study.**

| Antigen                      | Antibody/Clone Name | Host Species | Dilution    | Source                                                     | Application             |
|------------------------------|---------------------|--------------|-------------|------------------------------------------------------------|-------------------------|
| Acetylated $\alpha$ -tubulin | 6-11B-1             | Mouse        | 1:1000-2000 | Sigma                                                      | IF (1:500-2000)         |
| $\beta$ -actin               | AC-15               | Mouse        | 1:5000      | Sigma                                                      | WB (1:5000)             |
| CCDC39                       | HPA 037470          | Rabbit       | 1:200       | Sigma Atlas                                                | WB (1:5000); IF (1:200) |
| DNAAF2/KTU                   | ab99056             | Rabbit       | 1:5000      | Abcam                                                      | WB (1:5000)             |
| DNAAF3/C19orf51              | ab126301            | Rabbit       | 1:5000      | Abcam                                                      | WB (1:5000)             |
| DNAH5                        | HPA035364           | Rabbit       | 1:200       | Sigma Atlas                                                | WB (1:5000); IF (1:200) |
| DNAI2                        | IC8                 | Mouse        | 1:100-2000  | Abnova                                                     | IF (1:100), WB (1:5000) |
| DNALI1                       | HPA028305           | Rabbit       | 1:200       | Sigma Atlas                                                | IF (1:200)              |
| DNALI1                       | N-13                | Goat         | 1:75        | Santa Cruz                                                 | IF (1:75)               |
| ELAV                         | mAb ELAV            | Mouse        | 1:200       | Developmental Studies Hybridoma Bank                       | WIHC (1:200)            |
| FOXJ1                        | 2A5                 | Mouse        | 1:100       | LifeSpan BioSciences                                       | IF (1:100)              |
| Futsch                       | mAb-22C10           | Mouse        | 1:200       | Developmental Studies Hybridoma Bank                       | WIHC (1:200)            |
| Golgin 97                    | CDF4                | Mouse        | 1:250       | Molecular Probes                                           | IF (1:250)              |
| GFP                          | RbAb GFP            | Rabbit       | 1:500       | Molecular Probes                                           | WIHC (1:500)            |
| HEATR2                       | NB1-82183           | Rabbit       | 1:50-250    | Novus Biologicals                                          | WB (1:250); IF (1:50)   |
| HEATR2                       | Proteintech         | Rabbit       | 1:75-1000   | Proteintech                                                | WB (1:5000); IF (1:75)  |
| HEATR2                       | Q-16                | Goat         | 1:100-200   | Santa Cruz                                                 | WB (1:200); IF (1:100)  |
| Heatr2                       | DCP49.1             | Rabbit       | 1:100-200   | Custom                                                     | WB (1:500); IF (1:100)  |
| HRP                          | RbAb-HRP            | Rabbit       | 1:500       | Jackson Laboratories                                       | WIHC (1:500)            |
| HSP70                        | K-20                | Goat         | 1:5000      | Santa Cruz                                                 | WB (1:5000)             |
| HSP90 $\beta$                | MAB32861            | Mouse        | 1:5000      | R&D Systems                                                | WB (1:5000)             |
| NOMP C                       | mAb NOMP C          | Mouse        | 1:100       | Gift from J. Howard, Max Planck Institute Dresden, Germany | WIHC (1:100)            |
| Polyglutamylated tubulin     | GT335               | Mouse        | 1:100       | AdipoGen                                                   | WIHC (1:100)            |
| RFX3                         | T-17                | Goat         | 1:75        | Santa Cruz                                                 | IF (1:75)               |
| RFX3                         | HPA035689           | Rabbit       | 1:100       | Sigma Atlas                                                | IF (1:100)              |
| RFX                          | RbAb RFX            | Rabbit       | 1:1000      | Ref. 28                                                    | WIHC (1:1000)           |
| ZMYND10/BLU                  | TA308345            | Rabbit       | 1:5000      | Origene                                                    | WB (1:5000)             |

| Antigen                                                 | Host Species | Dilution       | Source               | Application |
|---------------------------------------------------------|--------------|----------------|----------------------|-------------|
| ECL $\alpha$ -Mouse IgG, HRP-conjugated                 | Sheep        | 1:7500-1:20000 | GE Healthcare UK Ltd | WB          |
| ECL $\alpha$ -Rabbit IgG, HRP-conjugated                | Sheep        | 1:7500-1:20000 | GE Healthcare UK Ltd | WB          |
| $\alpha$ -Rabbit IgG (Light Chain only), HRP-conjugated | Mouse        | 1:20000        | Millipore            | WB          |
| $\alpha$ -goat IgG-HRP                                  | Donkey       | 1:10000        | Santa Cruz           | WB          |
| Alexa 488, 594, 647-conjugated- $\alpha$ -Mouse         | Donkey       | 1:500          | Molecular Probes     | IF          |
| Alexa 488, 594, 647-conjugated- $\alpha$ -Rabbit        | Donkey       | 1:500          | Molecular Probes     | IF          |
| Alexa 488, 594, 647-conjugated- $\alpha$ -Goat          | Donkey       | 1:500          | Molecular Probes     | IF          |
