# Supplementary material for: HEATR2 Plays a Conserved Role in Assembly of the Ciliary Motile Apparatus
Source: PubMed Central journal article supplement (PMC4168999; doi:10.1371/journal.pgen.1004577), 2014-09-18
Supplement: pgen.1004577.s012.pdf [file pgen.1004577.s012.pdf]

**Table S4. Details of primers used in this study.**

| Gene           | Forward Primer                                          | Reverse Primer                                             | Purpose                                                                              |
|----------------|---------------------------------------------------------|------------------------------------------------------------|--------------------------------------------------------------------------------------|
| <i>CG31320</i> | 5'-CGTTCGCTCTAAAGCCATTC-3'                              | 5'-TCTTGTGATGCTGACGTAACCT-3'                               | <i>Drosophila</i> In situ hybridisation                                              |
|                | 5'-GGGGACAAGTTTGTACAAAAAAGCAGGCTGCCGCCAGAGTCGAACTC-3'   | 5'-GGGGACCACCTTGTACAAGAAAGCTGGGTTCATCTTGTGATGCTGACGTAAC-3' | <i>Drosophila</i> Venus fusion reporter construct: includes 283bp upstream of 5' UTR |
| <i>CG6971</i>  | 5'-GGGGACAAGTTTGTACAAAAAAGCAGGCTGAATTGGAAATGTGCAACGA-3' | 5'-GGGGACCACCTTGTACAAGAAAGCTGGGTCTTCTTGGGTGCGGTTATGC-3'    | <i>Drosophila</i> Venus fusion reporter construct: includes 324bp upstream of 5' UTR |
| <i>Fd3F</i>    | 5'-AATTCCAATTCCGCTCTT-3'                                | 5'-GGGCTCGAGCGCTGAAACTGGAGTCTGTTG-3'                       | <i>Drosophila</i> UAS misexpression construct                                        |
| <i>HEATR2</i>  | 5'-GAAAGCGCTGTCCCTTA -3'                                | 5'-GAGGTGGGGGTGAGAGTGT-3'                                  | <i>HEATR2</i> gDNA sequencing (Exon 1)                                               |
|                | 5'-GGGAGGTGAGGAACATAGG-3'                               | 5'-TGGTGCATACAGCACTCTGAA-3'                                | <i>HEATR2</i> gDNA sequencing (Exon 2)                                               |
|                | 5'-GTCCGTATGGCAGCACTCAG-3'                              | 5'-GAAGCTTCCCTCAGGCTCAGA-3'                                | <i>HEATR2</i> gDNA sequencing (Exon 3/4)                                             |
|                | 5'-TGTGATGTGCGGTAACCTGAG-3'                             | 5'-GTGCACGGCTGTGTCTGG-3'                                   | <i>HEATR2</i> gDNA sequencing (Exon 5/6)                                             |
|                | 5'-CCCACAGACATGTCATTACGA-3'                             | 5'-AGGGATGCATAGGAGACAGT-3'                                 | <i>HEATR2</i> gDNA sequencing (Exon 6)                                               |
|                | 5'-CGACCAAATGTACCAAGCTC-3'                              | 5'-AGGGATGCATAGGAGACAGT-3'                                 | <i>HEATR2</i> gDNA sequencing (Exon 7)                                               |
|                | 5'-GGGATAGTGAGTCCAGCAG-3'                               | 5'-CTTCAGTGAACCACAGCTCAG-3'                                | <i>HEATR2</i> gDNA sequencing (Exon 8)                                               |
|                | 5'-ATAGTGCCCTCTCCAGGTG-3'                               | 5'-CAGTGCAGTGTGGGGAAG-3'                                   | <i>HEATR2</i> gDNA sequencing (Exon 9)                                               |
|                | 5'-AGCCCCATTTCATCCTAGTCT-3'                             | 5'-GAGAGCCTCTTGGGGTACG-3'                                  | <i>HEATR2</i> gDNA sequencing (Exon 10)                                              |
|                | 5'-TAAAGCTTCAAGCCCCCTAA-3'                              | 5'-ACACCCAGCCGAGATAGTT-3'                                  | <i>HEATR2</i> gDNA sequencing (Exon 11)                                              |
|                | 5'-ATGCCCTTGTGGACGTTTAGA-3'                             | 5'-TCACACGGCTCAGTACAGAT-3'                                 | <i>HEATR2</i> gDNA sequencing (Exon 12)                                              |
|                | 5'-CAGCGTCAGGTTATTTGCAG-3'                              | 5'-CACAACTCTGGCTCAGGTG-3'                                  | <i>HEATR2</i> gDNA sequencing (Exon 13)                                              |
|                | 5'-AGAGCAGTGCCAGTACCTGT-3'                              | 5'-GTGTGCCGTGGCTGAAAC-3'                                   | <i>HEATR2</i> RPA cloning primers (Exons 12/13)                                      |
|                | 5'-AGTGCACCTGCTGGATCTG-3'                               | 5'-CAAACAGTCGCTGAGCAAAA-3'                                 | <i>HEATR2</i> cDNA RT-PCR (Exons 1-2)                                                |
|                | 5'-AGTGATCCATTTGGCAACG-3'                               | 5'-GCTCATGTGGAGGGTAATGG-3'                                 | <i>HEATR2</i> cDNA RT-PCR (Exons 2-4/5)                                              |
|                | 5'-GTGGCAGAAGGAGAATGAGG-3'                              | 5'-ACACCTCAGGGCTGACAAAC-3'                                 | <i>HEATR2</i> cDNA RT-PCR (Exons 4-6)                                                |
|                | 5'-GCCCTGAGGTGTTTCTGAAG-3'                              | 5'-GACTGTGCGACGATGACACT-3'                                 | <i>HEATR2</i> cDNA RT-PCR (Exons 6-8)                                                |
|                | 5'-GCTCCTGCAGTTCAGTGTCA-3'                              | 5'-CATCTTCGAATCCTCCTCA-3'                                  | <i>HEATR2</i> cDNA RT-PCR (Exons 8-11)                                               |
|                | 5'-TCGAGACGGTGACAAAGGAC-3'                              | 5'-ACGTGCAGGAAACACTGATG-3'                                 | <i>HEATR2</i> cDNA RT-PCR (Exons 10/11)                                              |
|                | 5'-ACGTGCAGGAAACACTGATG-3'                              | 5'-TCACCAGGAGATCTGGGAAC-3'                                 | <i>HEATR2</i> cDNA RT-PCR (Exons 11-13)                                              |
|                | 5'-CTGGTTCACCTTGACGATCC-3'                              | 5'-AGCCCTCTCGATGAACAGAA-3'                                 | <i>HEATR2</i> cDNA RT-PCR (Exons 12-3'UTR)                                           |
|                | 5'-AGTGTGTCAAGGGTGCCAAC-3'                              | 5'-GGCCTCAGGAAACTTCCAATC-3'                                | <i>HEATR2</i> cDNA RT-PCR (Exons 12-3'UTR)                                           |
|                | 5'-ACGTGCAGGAAACACTGATG-3'                              | 5'-GGGAACCAGGCACATCTAAA-3'                                 | <i>HEATR2-201</i> cDNA RT-PCR (Exons 11-Alternate final exon12/13)                   |
|                | 5'-AGTGTATCATCGTCACAGTC-3'                              | 5'-TCAGGGTTTGCCAAGAACTC-3'                                 | <i>HEATR2</i> cDNA RT-PCR (Exon 8 - Intron 12/13)                                    |
| <i>GAPDH</i>   | 5'-ACCACAGTCCATGCCATCAC-3'                              | 5'-TCCACCACCTGTTGCTGT-3'                                   | Human <i>GAPDH</i> reference cDNA control                                            |
| <i>HPRT</i>    | 5'-CAAGAGTCCTGTTGATGTG-3'                               | 5'-GGGAAACCTCTTAGATGCTGT-3'                                | Human <i>HPRT</i> reference cDNA control                                             |
| <i>TBP</i>     | 5'-GGGAAGGGCATTATTIG-3'                                 | 5'-CCAGATAGCAGCACGGTA-3'                                   | Human <i>TBP</i> reference cDNA control                                              |
