# Supplementary material for: HEATR2 Plays a Conserved Role in Assembly of the Ciliary Motile Apparatus
Source: PubMed Central journal article supplement (PMC4168999; doi:10.1371/journal.pgen.1004577), 2014-09-18
Supplement: pgen.1004577.s013.pdf [file pgen.1004577.s013.pdf]

**Table S5. Details of RT-qPCR primers and probes used in this study.**

| <b>Gene Assay</b> | <b>Species</b> | <b>Protocol</b> | <b>Forward Primer</b>         | <b>Reverse Primer</b>        | <b>UPL Probe No. (Roche)</b> |
|-------------------|----------------|-----------------|-------------------------------|------------------------------|------------------------------|
| <i>HEATR2</i>     | Human          | RT-qPCR         | 5'-TCTGCCAGGCATCTGAAAA-3'     | 5'-GCCACAGTCCTCATGACACA-3'   | 1                            |
| <i>TBP</i>        | Human          | RT-qPCR         | 5'-CGGCTGTTAACTTCGCTTC-3'     | 5'-CACACGCCAAGAAACAGTGA-3'   | 3                            |
| <i>Bbs5</i>       | Mouse          | RT-qPCR         | 5'-CTACCCGGTTTGAGTTTATATTC-3' | 5'-CTGCACTTCTCAACTTAAAGTC-3' | n/a                          |
| <i>Dnahc5</i>     | Mouse          | RT-qPCR         | 5'-AAGCTGTTGCACCAGACCAT-3'    | 5'-CCCAGGTGGCAGTTCTGTAG-3'   | 88                           |
| <i>Dnali1</i>     | Mouse          | RT-qPCR         | 5'-AGTTCCTGAAACGGACCAAC-3'    | 5'-TGAGACCCATGTGGAAATGA-3'   | 97                           |
| <i>Dync2li1</i>   | Mouse          | RT-qPCR         | 5'-ACCTTAGCGTTGGAGTACAC-3'    | 5'-TAAGTCCAGCAAGGAGGTTTC-3'  | n/a                          |
| <i>Foxj1</i>      | Mouse          | RT-qPCR         | 5'-GAACTTCTTCCAGAACCTTCCTC-3' | 5'-TCCTCCGAACACGAATGTG-3'    | 71                           |
| <i>Heatr2</i>     | Mouse          | RT-qPCR         | 5'-CTTCGATGACGTCCCTCAG-3'     | 5'-GTAGCGGTCCCGGAGATT-3'     | 46                           |
|                   |                |                 | 5'-CTCCCAACTACCCTGAGCAC-3'    | 5'-TGGAGAGGTTCTGAAGACC-3'    | 26                           |
|                   |                |                 | 5'-TCTCAGATGCCGTGGGTCTT-3'    | 5'-TGCGGTAGAGGTCCTGACTG-3'   | n/a                          |
| <i>Rfx3</i>       | Mouse          | RT-qPCR         | 5'-TGTCACCTCCAGTGTCTCA-3'     | 5'-TTGAGAACCATTGCAGATTCC-3'  | 6                            |
| <i>Zmynd10</i>    | Mouse          | RT-qPCR         | 5'-GCCATCCTTGATGCAACTATC-3'   | 5'-CAATCAGTCCTCCACCAG-3'     | 64                           |
| <i>Dync2li1</i>   | Mouse          | ChIP-qPCR       | 5'-ACTTCCCATGAGGCTGCTCT-3'    | 5'-GCAGGCTGCAAACACCTAGT-3'   | n/a                          |
| <i>Heatr2</i>     | Mouse          | ChIP-qPCR       | 5'-CATCGTACTAGCGCCGGTTC-3'    | 5'-CTTCAGCCGCCTCGGTTAAG-3'   | n/a                          |
