# Supplementary material for: HEATR2 Plays a Conserved Role in Assembly of the Ciliary Motile Apparatus
Source: PLoS Genet. 2014 Sep 18;10(9):e1004577. doi: 10.1371/journal.pgen.1004577 (PMC4168999; doi:10.1371/journal.pgen.1004577)
Supplement: Table S1 — Survey for HEATR2 orthologues across eukaryotes with presence of sensory cilia, motile cilia or flagella, as well as components of ciliary motility machinery of inner and outer dynein arms. Species examined are shown as rows, grouped as Deuterostomia (white), Ecdysozoa (yellow), Lophotrochozoa (orange), Cnidaria (purple), Fungi (blue), plants and protistan sister groups (aqua), other protists (green). Column 4: documented presence of motile cilia/flagella. Column 5: Presence of sensory monocilia. Column 6: Expanded notes of life-cycle stages with cilia or flagella. Column 7: Presence and identity of orthologs in other species as described in Material and methods. Where available, an NCBI accession number is provided, alternately a reference to the relevant species database (Ensembl, JGI, Phytozome) is given. Note for D. renio, the presence of two putative orthologues is a scaffolding artifact due to poor genomic reference sequence within the region (≈1/3 of the gene on chromosome 3, 1/3 on an unmapped scaffold and the middle of the gene missing). Column 8: The similarity of HEATR2 orthologues is represented as a percentage ID with the human HEATR2 sequence from the Clustal multiple alignments. Column 9: The presence of absence of HEATR2 orthologues. For visual simplicity, “yes” is colored green and “no” colored red. Columns 10–12: Presence or absence of outer dynein arm components [93]. For visual simplicity, “yes” is colored green and “no” colored red. Column 10: Orthologue of heavy chain motor subunit DNAH9 (C.reinhardtii DHC14)? Column 11: Orthologue of heavy chain motor subunit DNAH5 (C.reinhardtii DHC15) ? Column 12: Orthologue of light chain DNAL1 (C.reinhardtii DLU1)? Columns 13–15: Presence or absence of inner dynein arm components [93]. For visual simplicity, “yes” is colored green and “no” colored red. Column 13:,Orthologue of inner arm group 3 heavy chain DNAH3 (C. reinhardtii gene DHC4, closely related to DHC5 of the dynein species b/I3′)? Column 14: Ort [file pgen.1004577.s009.pdf]

**Table S1.** Survey for *HEATR2* orthologues across eukaryotes with presence of sensory cilia, motile cilia or flagella, as well as components of ciliary motility machinery of inner and outer dynein arms.

| 1. Species                            | 2. Common name                      | 3. Taxonomic Groups                                                                                               | 4. Presence of motile cilia/flagella | 5. Presence of monocilia        | 6. Notes                                                                                                                                                                                                                                                                                                                                                                                         | 7. Orthologue accension no./identifier             | 8. Percentage ID with human HEATR2 | 9. presence of HEATR2 | ODA                   |                       |                       | IDA                   |                       |                       |
|---------------------------------------|-------------------------------------|-------------------------------------------------------------------------------------------------------------------|--------------------------------------|---------------------------------|--------------------------------------------------------------------------------------------------------------------------------------------------------------------------------------------------------------------------------------------------------------------------------------------------------------------------------------------------------------------------------------------------|----------------------------------------------------|------------------------------------|-----------------------|-----------------------|-----------------------|-----------------------|-----------------------|-----------------------|-----------------------|
|                                       |                                     |                                                                                                                   |                                      |                                 |                                                                                                                                                                                                                                                                                                                                                                                                  |                                                    |                                    |                       | 10. presence of DNAH9 | 11. presence of DNAH5 | 12. presence of DNAL1 | 13. presence of DNAH3 | 14. presence of DNAH1 | 15. presence of DNAH2 |
| <i>Homo sapiens</i>                   | Human                               | Metazoa/Chordata/Craniata/Vertebrata/Euteleostomi/Mammalia                                                        | Y                                    | Y                               |                                                                                                                                                                                                                                                                                                                                                                                                  | NP_060272.3                                        |                                    | Y                     | Y                     | Y                     | Y                     | Y                     | Y                     | Y                     |
| <i>Xenopus tropicalis</i>             | African clawed toad                 | Metazoa/Chordata/Craniata/Vertebrata/Euteleostomi/Amphibia                                                        | Y                                    | Y                               |                                                                                                                                                                                                                                                                                                                                                                                                  | XP_002941855.1                                     | 53%                                | Y                     | Y                     | Y                     | Y                     | Y                     | Y                     | Y                     |
| <i>Mus musculus</i>                   | Mouse                               | Metazoa/Chordata/Craniata/Vertebrata/Euteleostomi/Mammalia                                                        | Y                                    | Y                               |                                                                                                                                                                                                                                                                                                                                                                                                  | NP_001074734.1                                     | 77%                                | Y                     | Y                     | Y                     | Y                     | Y                     | Y                     | Y                     |
| <i>Gallus Gallus</i>                  | Chicken                             | Metazoa/Chordata/Craniata/Vertebrata/Euteleostomi/Archosauria/Dinosauria/Saurischia/Theropoda/Coelurosauria/ Aves | Y                                    | Y                               |                                                                                                                                                                                                                                                                                                                                                                                                  | XP_414755.2                                        | 56%                                | Y                     | Y                     | Y                     | Y                     | Y                     | Y                     | Y                     |
| <i>Danio rerio</i>                    | Zebrafish                           | Metazoa/Chordata/Craniata/Vertebrata/Euteleostomi/Actinopterygii/Neopterygii /Teleostei /Ostariophysi             | Y                                    | Y                               |                                                                                                                                                                                                                                                                                                                                                                                                  | ENSADARP0000099975 & ENSADARP0000105546            | 43%                                | Y                     | Y                     | Y                     | Y                     | Y                     | Y                     | Y                     |
| <i>Oryzias latipes</i>                | Medaka fish                         | Metazoa/Chordata/Craniata/Vertebrata/Euteleostomi /Actinopterygii/Neopterygii/Teleostei/ Euteleostei              | Y                                    | Y                               |                                                                                                                                                                                                                                                                                                                                                                                                  | ENSORLPP0000010519                                 | 47%                                | Y                     | Y                     | Y                     | Y                     | Y                     | N                     | Y                     |
| <i>Takifugu rubripes</i>              | Puffer fish                         | Metazoa/Chordata/Craniata/Vertebrata/Euteleostomi /Actinopterygii/Neopterygii/Teleostei/ Euteleostei              | Y                                    | Y                               |                                                                                                                                                                                                                                                                                                                                                                                                  | ENSTRUP00000008985                                 | 51%                                | Y                     | Y                     | Y                     | Y                     | Y                     | N                     | Y                     |
| <i>Branchiostoma floridae</i>         | Amphioxus/lancelet                  | Metazoa/Chordata /Cephalochordata/Branchiostomidae                                                                | Y                                    | Y                               | Larval movement by epidermal cilia and motile sperm                                                                                                                                                                                                                                                                                                                                              | XP_002606952.1                                     | 46%                                | Y                     | Y                     | Y                     | Y                     | Y                     | Y                     | Y                     |
| <i>Ciona intestinalis</i>             | Sea squirt                          | Metazoa/Chordata/Urochordata/Ascidacea/ Enterogona/ Phlebobranchia/ Clonidae                                      | Y                                    | Y                               | Transient single cilia are transiently present on each ectoderm cell of the late neurula/early tailbud stage embryo, a time point just before onset of asymmetric nodal expression, posteriorly positioned, like mouse node cilia. But C. intestinalis cilia have a 9+0 ring ultrastructure and no ascribed motility. Motile sperm flagella.                                                     | XP_002127221.1                                     | 39%                                | Y                     | Y                     | Y                     | Y                     | Y                     | N                     | Y                     |
| <i>Strongylocentrotus purpuratus</i>  | Purple sea urchin                   | Metazoa/Echinodermata/Eleutherozoa/Echinozoa/Echinoidea                                                           | Y                                    | Y                               | Sea urchin embryos swim by ciliary movement as well as having a motile sperm flagella.                                                                                                                                                                                                                                                                                                           | XP_791189.2                                        | 43%                                | Y                     | Y                     | Y                     | Y                     | Y                     | Y                     | Y                     |
| <i>Drosophila melanogaster</i>        | Fruit fly                           | Metazoa/Arthropoda/ Hexapoda/Insecta/Pterygota/Neoptera/Endopterygota/Diptera/ Brachycera/Muscomorpha             | Y                                    | Y* motile machinery             | Chordontal organs and sperm flagella. The scolopidium, the sensillum which characterizes chordontal organs, is an elaborate micromechanical transducer which consists of one or more bipolar sensory neurons, each with a ciliated dendrite enveloped by two specialised cells, the scolopale cell and the attachment (cap) cell, plus a glial cell.                                             | NP_731905.1                                        | 18%                                | Y                     | Y                     | Y                     | Y                     | Y                     | N                     | Y                     |
| <i>Anopheles gambiae</i>              | Mosquito                            | Metazoa/Arthropoda/ Hexapoda/ Insecta/ Pterygota/Neoptera/Endopterygota/Diptera/ Nematocera                       | Y                                    | Y* motile machinery             | Flagellar motility and chordontal organs.                                                                                                                                                                                                                                                                                                                                                        | XP_320940.5                                        | 28%                                | Y                     | Y                     | Y                     | Y                     | Y                     | N                     | Y (partial)           |
| <i>Apis mellifera</i>                 | Honey bee                           | Metazoa/Arthropoda/Hexapoda/ Insecta/Pterygota/ Neoptera/Endopterygota/Hymenoptera/ Apocrita                      | Y                                    | Y* motile machinery             | Sperm flagella and chordontal organs.                                                                                                                                                                                                                                                                                                                                                            | XP_393238.2                                        | 35%                                | Y                     | Y                     | Y                     | Y                     | Y                     | N                     | Y                     |
| <i>Bombyx mori</i>                    | Silk moth                           | Metazoa/Arthropoda/Hexapoda/ Insecta/ Pterygota/ Neoptera/Endopterygota/Lepidoptera                               | Y                                    | Y                               | Motile sperm flagella and an anomalous sensillum chaeticum with a double set of cilia and outer dendritic segments                                                                                                                                                                                                                                                                               | BGIBMGA005649-TA (Ensembl)                         | 23%                                | Y                     | Y                     | Y                     | Y                     | N                     | N                     | Y                     |
| <i>Daphnia pulex</i>                  | Water flea                          | Metazoa/ Arthropoda/Crustacea/Branchiopoda/Diplostraca                                                            | N                                    | Y* motile machinery             | Mechanosensory cilia akin to chordontal organs in <i>Drosophila</i> , although sperm are tailless or with short pseudopod extensions.                                                                                                                                                                                                                                                            | EFX78397.1                                         | 15%                                | Y                     | Y                     | Y                     | Y                     | N                     | N                     | N                     |
| <i>Caenorhabditis elegans</i>         | Nematode worm                       | Metazoa/ Nematoda/Chromadorea/ Rhabditida                                                                         | N                                    | Y [9(1) and (2) in same cilium] |                                                                                                                                                                                                                                                                                                                                                                                                  | N/A                                                | N/A                                | N                     | N                     | N                     | N                     | N                     | N                     | N                     |
| <i>Brugia malayi</i>                  | Filarial worm                       | Metazoa/Nematoda/ Chromadorea/Spirurida                                                                           | N                                    | Y                               |                                                                                                                                                                                                                                                                                                                                                                                                  | N/A                                                | N/A                                | N                     | N                     | N                     | N                     | N                     | N                     | N                     |
| <i>Capitella sp. I</i>                | Polychaete/ribbon worm              | Metazoa/Annelida/ Polychaeta/ Scolelelida/Capitellida                                                             | Y                                    | Y                               | Fertilized eggs develop into segmented, motile metatrochophore where swimming is powered by two bands of cilia, an anterior prototroch, and a posterior telotroch. A large cluster of cilia, the neurotroch, on the ventral surface i). These ciliary bands are not only important in locomotion, but may also have a chemosensory role in settlement and metamorphosis                          | Jgi Capca1 167239 estExt_Genewise1Plus.C_2760033   | 43%                                | Y                     | Y                     | Y                     | Y                     | Y                     | Y                     | Y                     |
| <i>Schistosoma mansoni</i>            | Trematode agents of schistosomiasis | Metazoa/Platyhelminthes/Trematoda/Digenea                                                                         | Y                                    | Y                               | Sperm flagella and a free-living miracidium stage of the platyhelminth with ciliary beat across surface                                                                                                                                                                                                                                                                                          | XP_002575880.1                                     | 18%                                | Y                     | Y                     | Y                     | Y                     | Y                     | Y                     | Y                     |
| <i>Helobdella robusta</i>             | Leech                               | Metazoa/Annelida/Citellata/Hirudinida/ Hirudinea/ Rhynchobdellida                                                 | Y                                    | Y                               | . Trochophore produce a type of freeswimming planktonic larva, trochophore larvae that have bands of cilia in the middle.                                                                                                                                                                                                                                                                        | Jgi Heiro1 111152 estExt_Genewise1Plus.C_200326    | 35%                                | Y                     | Y                     | Y                     | Y                     | Y                     | Y                     | Y                     |
| <i>Lottia gigantea</i>                | Owl limpet                          | Metazoa/Mollusc/Gastropoda/Patelloagastropoda/Lottiidea                                                           | Y                                    | Y                               | Round edge of the foot the owl limpet the pallial gill system uses currents caused by the beating of cilia to circulate water over the gills                                                                                                                                                                                                                                                     | Jgi Lotgi1 210534 estExt_Genewise1Plus.C_sca_60237 | 42%                                | Y                     | Y                     | Y                     | Y                     | Y                     | Y                     | Y                     |
| <i>Nematostella vectensis</i>         | Star anemone                        | Metazoa/Cnidaria/ Anthozoa/Hexacorallia/Actinaria/Edwardsiidae                                                    | Y                                    | Y                               | Sensory structures at the apical pole of tuft of cilia in larvae: signaling functions                                                                                                                                                                                                                                                                                                            | NEMVEDRAFT_v1g98098+genewise                       | 37%                                | Y                     | Y                     | Y                     | Y                     | Y                     | Y                     | Y                     |
| <i>Hydra magnipapillata</i>           | Hydra                               | Metazoa/Cnidaria/Hydrozoa/Hydrzoa/Anthomedusae/Hydridae                                                           | Y                                    | ?                               | Endodermal sensory cells had a small round exposed surface provided with a single cilium. Cnidocil at the apical end of Hydra nematocytes is a mechanosensory cilium, which acts as a "trigger" for discharge of the nematocyst capsule                                                                                                                                                          | XP_002154834.1                                     | 2.00E-148                          | Y                     | Y                     | Y                     | Y                     | Y                     | Y                     | Y                     |
| <i>Trichoplax adhaerens</i>           | Placozoan                           | Metazoa /Placozoa                                                                                                 | Y                                    | ?                               | Two cellular layers: the top epitheloid layer is made of ciliated "cover cells" flattened toward the outside of the organism, and the bottom layer is made up of cylinder cells that possess cilia used in locomotion, and gland cells that lack cilia                                                                                                                                           | XP_002109889.1+ genewise                           | 36%                                | Y                     | Y                     | Y                     | Y                     | Y                     | Y                     | Y                     |
| <i>Amphimedon queenslandica</i>       | Sponge                              | Metazoa/Porifera/Demospongiae/Ceractinomorpha/ Haplosclerida/Niphathidae                                          | Y                                    | Y                               | Larvae have a ciliated outer epithelium. Larvae display negative phototactic behavior mediated by a ring of long-ciliated, pigmented cells at the posterior pole. Decreased expression of genes involved in assembly of cilia/flagellar structures in transition to metamorphosis may be responsible, in part, for the decrease in swimming behavior that accompanies settlement on a substrate. | XP_003385039.1                                     | 33%                                | Y                     | Y                     | Y                     | Y                     | Y                     | Y                     | Y                     |
| <i>Saccharomyces cerevisiae</i>       | Baker's yeast                       | Fungi/Dikarya/Ascomycota/Saccharomycotina                                                                         | N                                    | N                               |                                                                                                                                                                                                                                                                                                                                                                                                  | N/A                                                | N/A                                | N                     | N                     | N                     | N                     | N                     | N                     | N                     |
| <i>Laccaria bicolor</i>               | Bicoloured deceiver fungus          | Fungi/Dikarya/Basidiomycota/Agaricomycotina/ Homobasidiomycete/Agaricomycetidae/Agaricales                        | N                                    | N                               |                                                                                                                                                                                                                                                                                                                                                                                                  | N/A                                                | N/A                                | N                     | N                     | N                     | N                     | N                     | N                     | N                     |
| <i>Aspergillus niger</i>              | Mold                                | Fungi/ Dikarya/Ascomycota/Saccharomycota/Pezizomycotina/ Eurotiomycetes                                           | N                                    | N                               |                                                                                                                                                                                                                                                                                                                                                                                                  | N/A                                                | N/A                                | N                     | N                     | N                     | N                     | N                     | N                     | N                     |
| <i>Batrachochytrium dendrobatidis</i> | Chytrid fungus infecting amphibians | Fungi/Chytridiomycota/Chytridiomycetes/Rhizophydiales/ Rhizophydiales incertae sedis                              | Y                                    | N                               | ciliated chytrid fungus: pathogen of amphibians: have conserved IFT genes but lack most components of the BBS complex. suggests cilia were lost independently in many fungal species in evolution (common ancestor was ciliated)                                                                                                                                                                 | Jgi Batde5 33895 estExt_fgenesh1_pg_C_10101        | 20%                                | Y                     | Y                     | Y                     | Y                     | Y                     | Y                     | Y                     |
| <i>Populus trichocarpa</i>            | Poplar                              | Viridiplantae/ Streptophyta/ Embryophyta/Tracheophyta/ Euphyllophyta/Spermatophyta/Magnoliophyta/ Eudicotyledons  | N                                    | N                               |                                                                                                                                                                                                                                                                                                                                                                                                  | N/A                                                | N/A                                | N                     | N                     | N                     | N                     | N                     | N                     | N                     |

| 1. Species                                    | 2. Common name                 | 3. Taxonomic Groups                                                                                              | 4. Presence of motile cilia/flagella                                                                      | 5. Presence of monocilia | 6. Notes                                                                                                                                                                                                                                                                                                                                                       | 7. Orthologue accession no./identifier           | 8. Percentage ID with human HEATR2 | 9. presence of HEATR2 | ODA                   |                       |                       | IDA                   |                       |                       |
|-----------------------------------------------|--------------------------------|------------------------------------------------------------------------------------------------------------------|-----------------------------------------------------------------------------------------------------------|--------------------------|----------------------------------------------------------------------------------------------------------------------------------------------------------------------------------------------------------------------------------------------------------------------------------------------------------------------------------------------------------------|--------------------------------------------------|------------------------------------|-----------------------|-----------------------|-----------------------|-----------------------|-----------------------|-----------------------|-----------------------|
|                                               |                                |                                                                                                                  |                                                                                                           |                          |                                                                                                                                                                                                                                                                                                                                                                |                                                  |                                    |                       | 10. presence of DNAH9 | 11. presence of DNAH5 | 12. presence of DNAL1 | 13. presence of DNAH3 | 14. presence of DNAH1 | 15. presence of DNAH2 |
| <i>Arabidopsis thaliana</i>                   | Thale cress                    | Viridiplantae/ Streptophyta/ Embryophyta/Tracheophyta/ Euphyllaphyta/Spermatophyta/Magnoliophyta/ Eudicotyledons | N                                                                                                         | N                        |                                                                                                                                                                                                                                                                                                                                                                | N/A                                              | N/A                                | N                     | N                     | N                     | N                     | N                     | N                     | N                     |
| <i>Selaginella moellendorffii</i>             | Spikemoss/Clubmoss             | Viridiplantae/Streptophyta/Embryophyta / Tracheophyta/Lycopodiophyta/Isoetopsida/Selaginellales                  | Yes (9+2)                                                                                                 | N                        | Flagellated zoospores                                                                                                                                                                                                                                                                                                                                          | XP_002985243.1                                   | 23%                                | Y                     | Y                     | Y                     | N                     | Y                     | Y                     | Y                     |
| <i>Physcomitrella patens</i>                  | Moss                           | Viridiplantae/Streptophyta/ Embryophyta/Bryophyta/Bryopsida/Funariidae/ Funariales/Funariaceae                   | Y                                                                                                         | N                        | Male gametes have flagella with motile axonemes have motile flagella without outer arm dynein.                                                                                                                                                                                                                                                                 | XP_001769427.1                                   | 12%                                | Y                     | N                     | N                     | N                     | Y                     | Y                     | Y                     |
| <i>Chlamydomonas reinhardtii</i>              | Unicellular alga               | Viridiplantae/Chlorophyta/Chlorophyceae/ Chlamydomonadales/Chlamydomonadaceae                                    | Y                                                                                                         | N                        | Biflagellate, unicellular green algae                                                                                                                                                                                                                                                                                                                          | Cre09_g395500.t1.2                               | 18%                                | Y                     | Y                     | Y                     | Y                     | Y                     | Y                     | Y                     |
| <i>Volvox carteri</i>                         | Simple colonial protist        | Viridiplantae/Chlorophyta/Chlorophyceae/Chlamydomonadales/ Volvocaceae                                           | Y                                                                                                         | N                        | Colonial green algae of biflagellate, unicellular members.                                                                                                                                                                                                                                                                                                     | Vocar20004522m                                   | 16%                                | Y                     | Y                     | Y                     | Y                     | Y                     | Y                     | Y                     |
| <i>Chlorella variabilis NC64A</i>             | Non-motile green alga          | Viridiplantae/Chlorophyta/Trebouxiophyceae/Chlorellales                                                          | ?                                                                                                         | N                        | Single-cell green algae, with spherical shape, assumed to be asexual and nonmotile, but the NC64A genome encodes all the known meiosis-specific proteins and a subset of proteins found in flagella. It is hypothesized that <i>Chlorella might</i> have retained a flagella-derived structure that could be involved in sexual reproduction.                  | jgi ChlNC64A_1 58759 estExt_fgenesH3_pg_C_200085 | 12%                                | Y                     | Y                     | Y                     | Y                     | N                     | N                     | N                     |
| <i>Ostreococcus lucimarinus</i>               | Sister group plant             | Viridiplantae/Chlorophyta/Prasinophyceae/Mamiellales                                                             | N                                                                                                         | N                        | Unicellular coccoid green alga with no flagella                                                                                                                                                                                                                                                                                                                | N/A                                              | N/A                                | N                     | N                     | N                     | N                     | N                     | N                     | Y                     |
| <i>Micromonas sp.</i>                         | Micro "alga" protist           | Viridiplantae/ Chlorophyta/Prasinophyceae/Mamiellales                                                            | Y (9+2)                                                                                                   | N                        | Micromonas is a eukaryotic, photosynthetic microorganism (picophytoplankton): small single-celled micro-algae. The cells are 1-3 µm long, with a single posterior flagellum divided into a very short basal part and a longer hairpoint which contains only the central pair of flagellar axoneme microtubules.                                                | XP_002500672.1                                   | 18%                                | Y                     | Y                     | Y                     | Y                     | Y                     | Y                     | Y                     |
| <i>Cyanidioschyzon merolae</i>                | Red algae                      | Rhodophyta/ Bangiophyceae/Cyanidiales/Cyanidiaceae                                                               | N                                                                                                         | N                        |                                                                                                                                                                                                                                                                                                                                                                | N/A                                              | N/A                                | N                     | N                     | N                     | N                     | N                     | N                     | N                     |
| <i>Dictyostelium discoideum</i>               | Cellular slime mould           | Amoebozoa/ Mycetozoa/Dictyostelida                                                                               | N                                                                                                         | N                        | Slime mold that transitions from a collection of unicellular amoebae into a multicellular slug and then into a fruiting body . Unique asexual lifecycle that consists of four stages: vegetative, aggregation, migration, and culmination. No flagella                                                                                                         | N/A                                              | N/A                                | N                     | N                     | N                     | N                     | N                     | N                     | N                     |
| <i>Entamoeba</i>                              | Amoeba                         | Amoebozoa/Archamoebae/Entamoebidae                                                                               | N                                                                                                         | N                        | A single lobose pseudopod with a simple life cycle. The trophozoite (feeding-dividing form) is approximately 10-20 µm in diameter and feeds primarily on bacteria. It divides by simple binary fission to form two smaller daughter cells.                                                                                                                     | N/A                                              | N/A                                | N                     | N                     | N                     | N                     | N                     | N                     | N                     |
| <i>Naegleria gruberi</i>                      | Amoeboflagellate               | Heterolobosea/Schizopyrenida/Vahlkampfiidae                                                                      | Y (9+2)                                                                                                   | N                        | Free-living organism changes from an amoeba, which lacks a cytoplasmic microtubule cytoskeleton, to a flagellate, which has an elaborate microtubule cytoskeleton, including flagella. This "transformation" includes de novo synthesis of basal bodies (or centrioles).                                                                                       | jgi Naegr1 56483 estExt_fgenesHS_pg_C_10167      | 18%                                | Y                     | Y                     | Y                     | Y                     | Y                     | Y                     | Y                     |
| <i>Monosiga brevicollis</i>                   | Collar flagellate              | Choanoflagellida/Codonosigidae/Monosiga                                                                          | Y                                                                                                         | N                        | Marine choanoflagellates: microscopic, heterotrophic single-celled and colony-forming eukaryotes with apical flagellum                                                                                                                                                                                                                                         | XP_001747042.1                                   | 26%                                | Y                     | Y                     | Y                     | Y                     | Y                     | Y                     | Y                     |
| <i>Paramecium tetraurelia</i>                 | Slipper animal                 | Alveolata/Ciliophora/Intramacronucleata/Oligohymenophorea/ Peniculida                                            | Y                                                                                                         | N                        | Unicellular eukaryote of large size (120 micrometers) that belongs to the ciliate phylum. Ciliates share two characteristics: the presence of vibrating cilia which assure their locomotion and food capture, and nuclear dimorphism.                                                                                                                          | XP_001455888.1                                   | 7%                                 | Y                     | N                     | N                     | Y                     | Y                     | Y                     | N                     |
| <i>Tetrahymena thermophila</i>                | Ciliate                        | Alveolata/Ciliophora/Intramacronucleata/Oligohymenophorea/ Hymenostomatida                                       | Y                                                                                                         | N                        | Free-living ciliate protozoa with hundreds of motile cilia                                                                                                                                                                                                                                                                                                     | XP_001024181.1                                   | 12%                                | Y                     | Y                     | Y                     | Y                     | Y                     | Y                     | Y                     |
| <i>Plasmodium falciparum</i>                  | Malaria parasite               | Alveolata/ Apicomplexa/Aconoidasida/Haemosporida                                                                 | Yes - no IFT genes                                                                                        | N                        | The male gamete maturation involves significant morphological development. The male gamete's DNA divides three times to form eight nuclei. Concurrently, eight flagella are formed. Each flagellum pairs with a nucleus to form a microgamete, which separates from the parasite cell. This process is referred to as exflagellation and does not require IFT. | XP_001347805.1                                   | 9%                                 | Y                     | Y                     | Y                     | Y                     | N                     | Y                     | Y                     |
| <i>Toxoplasma gondii</i>                      | Cat toxoplasma                 | Alveolata/Apicomplexa/Coccidia/Eucoccidiorida/Eimeriorina/ Sarcocystidae                                         | Yes - no IFT genes                                                                                        | N                        | parasitic protozoa: T. gondii parasitic stages lack flagella and cilia, but can move via cell crawling, but male gametes have flagella and utilize flagellar motility to reach and fertilize female gametes.                                                                                                                                                   | XP_002371436.1                                   | 8%                                 | Y                     | Y                     | N                     | N                     | N                     | Y                     | Y                     |
| <i>Thalassiosira pseudonana</i>               | Centric Diatom                 | Stramenopiles/Bacillariophyta/ Coscinodiscophyceae/Thalassiosirophyceae/Thalassiosirales                         | Yes, in sperm (9+0; no IFT-A genes)                                                                       | N                        | Marine centric diatom. Male gametes have flagella with motile axonemes without inner arm dyneins                                                                                                                                                                                                                                                               | XP_002291746.1                                   | 12%                                | Y                     | Y                     | Y                     | Y                     | N                     | N                     | N                     |
| <i>Phaeodactylum tricornutum</i>              | Raphid Pennate Diatom          | Stramenopiles/Bacillariophyta/Bacillariophyceae/ Bacillariophycidae/Naviculales/Phaeodactylaceae                 | No                                                                                                        | N                        | Diatom no clear sexual reproductive state. Microalgae.                                                                                                                                                                                                                                                                                                         | N/A                                              | N/A                                | N                     | N                     | N                     | N                     | N                     | N                     | N                     |
| <i>Aureococcus anophagefferens</i>            | Algal bloom                    | Stramenopiles/Pelagophyceae                                                                                      | Unknown. But other Pelagophyceae have flagellated zoospores (Chrysonephos, or basal bodies Pelagococcus). | N                        | Spherical, non-motile very small pelagophyte which has caused destructive 'brown tide' ocean blooms. (Chrysophyte: golden algae, appears to be non-flagellate?)                                                                                                                                                                                                | N/A                                              | N/A                                | N                     | N                     | N                     | Y                     | Y                     | Y                     | Y                     |
| <i>Phytophthora sojae</i>                     | Soybean pathogen               | Stramenopiles/Oomycetes                                                                                          | Y                                                                                                         | N                        | Oomycete which causes a serious root and stem rot of soybeans, has motile zoospores lack cell walls and swim by means of two flagella of unequal length                                                                                                                                                                                                        | EG228174.1                                       | 22%                                | Y                     | Y                     | Y                     | Y                     | Y                     | Y                     | Y                     |
| <i>Emiliania huxleyi</i>                      | Coccolithophore                | Haptophyceae/Isochrysidales/Noelaerhabdaceae                                                                     | Y                                                                                                         | N                        | Species of photosynthetic phytoplankton with haploid (N) flagellated phase which is motile and noncalcifying.                                                                                                                                                                                                                                                  | gm1.1400361, Protein ID: 201668                  | N/A                                | Y                     | N                     | N                     | Y                     | Y                     | Y                     | N                     |
| <i>Giardia lamblia</i>                        | Flagellated protozoan parasite | Formicata/Diplomonadida/Hexamitidae                                                                              | Y                                                                                                         |                          | Flagellated protozoan parasite that colonizes and reproduces in the small intestine, causing giardiasis                                                                                                                                                                                                                                                        | XP_001709522.1                                   | 12%                                | Y                     | N                     | Y                     | Y                     | Y                     | Y                     | Y                     |
| <i>Trypanosoma brucei brucei strain 927/4</i> | Trypanosome                    | Euglenozoa/Kinetoplastida/Trypanosomatida                                                                        | Y                                                                                                         | N                        | Protozoan with single flagella that causes African trypanosomiasis (or sleeping sickness) in humans and nagana in animals                                                                                                                                                                                                                                      | XP_845251.1                                      | 15%                                | Y                     | Y                     | Y                     | Y                     | Y                     | Y                     | Y                     |
| <i>Trypanosoma cruzi strain CL Brener</i>     | Trypanosome                    | Euglenozoa/Kinetoplastida/Trypanosomatidae                                                                       | Y                                                                                                         | N                        | Single flagellum on parasitic trypanosome causing Chagas disease.                                                                                                                                                                                                                                                                                              | XP_820150.1                                      | 16%                                | Y                     | Y                     | Y                     | Y                     | Y                     | Y                     | Y                     |
